# Supplementary material for: The Shift of the Intestinal Microbiome in the Innate Immunity-Deficient Mutant rde-1 Strain of C. elegans upon Orsay Virus Infection
Source: Front Microbiol. 2017 May 29;8:933. doi: 10.3389/fmicb.2017.00933 (PMC5446984; doi:10.3389/fmicb.2017.00933)
Supplement: Supplementary file 6 [file Table_3.xlsx]

## Sheet: W_InfectvsW_Mock.DEG
Table S3 Differentially expressed genes in N2 animals upon Orsay virus infection.
Gene_id	readcount_N2_OrV	readcount_N2_Mock	log2.Fold_change	pvalue	qvalue	Gene name	Gene description
WBGene00006650	1289.84	449.187	1.5218	1.3431e-99	1.2431e-95	tts-1
WBGene00012592	166	44.8154	1.8891	1.3592e-18	1.5726e-15	Y38E10A.14
WBGene00003099	322.438	147.561	1.1277	2.1772e-17	2.2391e-14	lys-10	LYSozyme [Source:RefSeq peptide;Acc:NP_501405]
WBGene00004987	211.571	77.7558	1.4441	1.4345e-16	1.3976e-13	spp-2	SaPosin-like Protein family [Source:RefSeq peptide;Acc:NP_741832]
WBGene00016943	125.685	298.942	-1.2501	1.8642e-16	1.7255e-13	acdh-1	Acyl CoA DeHydrogenase [Source:RefSeq peptide;Acc:NP_491871]
WBGene00009429	188.57	78.2721	1.2685	1.321e-12	9.0573e-10	F35E12.5
WBGene00012608	121.808	254.849	-1.065	3.0745e-11	1.7786e-08	Y38F1A.6	Probable hydroxyacid-oxoacid transhydrogenase mitochondrial [Source:UniProtKB/Swiss-Prot;Acc:Q9U2M4]
WBGene00015759	196.668	94.4842	1.0576	2.8759e-10	1.5211e-07	C14C6.5
WBGene00000615	153.854	75.5873	1.0253	5.214e-08	1.7236e-05	col-38	COLlagen [Source:RefSeq peptide;Acc:NP_495810]
WBGene00008448	118.276	52.56	1.1701	1.2575e-07	3.9457e-05	E01G4.6
WBGene00018138	35.5776	96.5494	-1.4403	1.6115e-07	4.9719e-05	folt-2	Folate-like transporter 2 [Source:UniProtKB/Swiss-Prot;Acc:O45166]
WBGene00002016	132.749	64.0221	1.0521	2.4825e-07	7.4122e-05	hsp-16.2	Heat shock protein Hsp-16.2 [Source:UniProtKB/Swiss-Prot;Acc:P06582]
WBGene00009877	121.636	56.3807	1.1093	2.6762e-07	7.8637e-05	F49C12.7
WBGene00001158	96.3094	39.9622	1.269	3.9825e-07	0.0001117	ech-9	Enoyl-CoA Hydratase [Source:RefSeq peptide;Acc:NP_501875]
WBGene00009773	102.943	47.9133	1.1033	2.4349e-06	0.00062604	lipl-2	Lipase [Source:RefSeq peptide;Acc:NP_505527]
WBGene00000639	80.2866	35.0056	1.1976	9.3586e-06	0.0022322	col-63	COLlagen [Source:RefSeq peptide;Acc:NP_492245]
WBGene00000678	93.2082	45.5383	1.0334	2.017e-05	0.0045534	col-104	COLlagen [Source:RefSeq peptide;Acc:NP_500070]
